# Supplementary material
Source: PubMed Central journal article supplement (PMC3177066)
Supplement: mmc1.pdf [file mmc1.pdf]

# Supporting Materials for Landscape, Flux, Correlation, Resonance, Coherence, Stability and Key Network Wirings of Stochastic Circadian Oscillation

Chunhe Li<sup>1,3</sup>, Erkang Wang<sup>1,\*</sup>, Jin Wang<sup>1,2,\*</sup>

**1** State Key Laboratory of Electroanalytical Chemistry, Changchun Institute of Applied Chemistry, Chinese Academy of Sciences, Changchun, Jilin, China

**2** Department of Chemistry and Physics, State University of New York at Stony Brook, Stony Brook, NY, USA

**3** Graduate School of the Chinese Academy of Sciences, Beijing, China

\* E-mail: jin.wang.1@stonybrook.edu, ekwang@ciac.jl.cn

## Coherence of oscillation system

The robustness of the oscillation with respect to molecule number  $V$  can be quantified further by the phase coherence  $\xi$ , which measures the degree of periodicity of the time evolution of a given variable. (1) The phase coherence  $\xi$  quantitatively measures the degree of persistence of the oscillatory phase, and is defined as follows: First, the vector  $N(t) = n_1(t)e_1 + n_2(t)e_2$  is shown in Figure 1. The unit vectors are  $e_1 = (1, 0)$  and  $e_2 = (0, 1)$ ,  $n_1(t)$  and  $n_2(t)$  are the concentration of the two kinds of protein molecules at time  $t$ . Then  $\phi(t)$  is the phase angle between  $N(t)$  and  $N(t + \tau)$ , where  $\tau$  should be smaller than the deterministic period and larger than the fast fluctuations.  $\phi(t) > 0$  to represent that the oscillation goes on the positive orientation (counterclockwise). The formula of  $\xi$  is shown as:

$$\xi = \frac{2\sum_i \theta(\phi(t))\phi(t)}{\sum_i |\phi(t)|} - 1 \quad (1)$$

where  $\theta(\phi) = 1$  when  $\phi(t) > 0$ , and  $\theta(\phi) = 0$  when  $\phi(t) \leq 0$ , and sums are taken over every time steps for the simulated trajectory.  $\xi \approx 0$  means the system moves stochastically. The oscillation is most coherent as  $\xi$  is close to 1. In the presence of fluctuations, the more periodic the evolution is, the larger the value of  $\xi$  is.

## References

1. Yoda, M., W. Ushikubo, T. Inoue, and M. Sasai, 2007. Roles of noise in single and coupled multiple genetic oscillators. *J. Chem. Phys.* 126:115101,1–11.

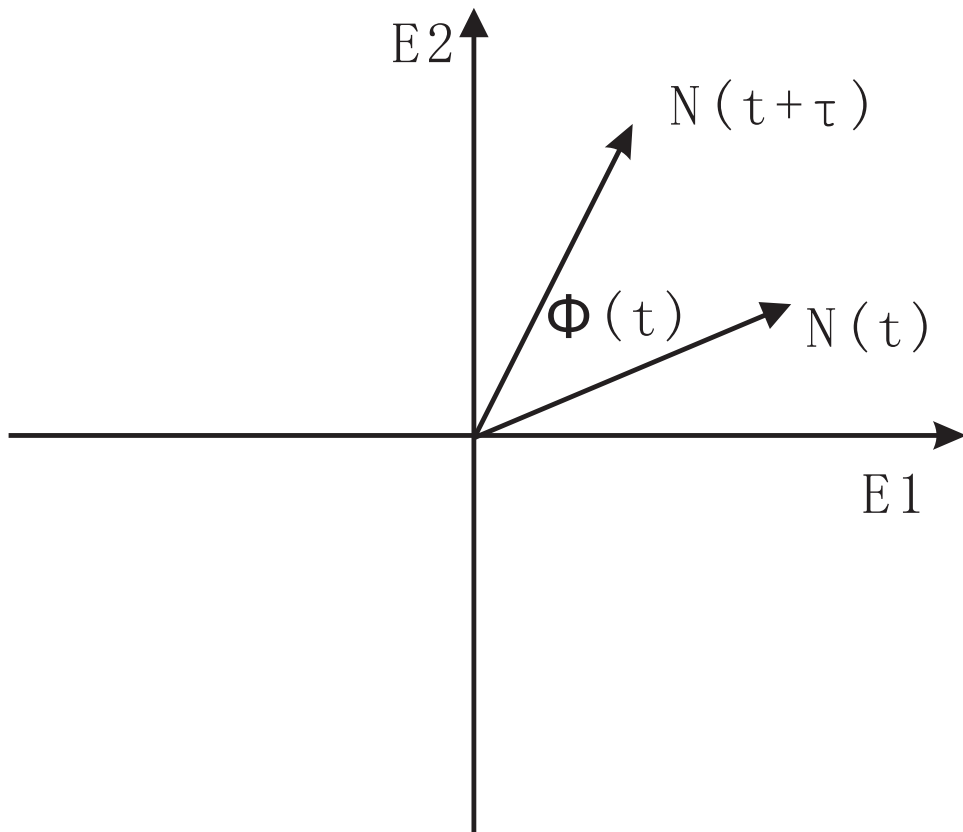

**Figure 1.** Definition of phase coherence.
